# Supplementary material
Source: publisher figshare collection journal article supplement (https://acs.figshare.com/ndownloader/files/3991321)
Supplement: Supplementary file 1 [file 3991321]

 
data_compound_3g 
 
_audit_creation_method            SHELXL-97 
_chemical_name_systematic 
; 
 ? 
; 
_chemical_name_common             ? 
_chemical_melting_point           ? 
_chemical_formula_moiety          'C17 H11 Cl N2 O5' 
_chemical_formula_sum 
 'C17 H11 Cl N2 O5' 
_chemical_formula_weight          358.73 
_chemical_absolute_configuration  ad
 
loop_ 
 _atom_type_symbol 
 _atom_type_description 
 _atom_type_scat_dispersion_real 
 _atom_type_scat_dispersion_imag 
 _atom_type_scat_source 
 'C'  'C'   0.0181   0.0091 
 'International Tables Vol C Tables 4.2.6.8 and 6.1.1.4' 
 'H'  'H'   0.0000   0.0000 
 'International Tables Vol C Tables 4.2.6.8 and 6.1.1.4' 
 'N'  'N'   0.0311   0.0180 
 'International Tables Vol C Tables 4.2.6.8 and 6.1.1.4' 
 'O'  'O'   0.0492   0.0322 
 'International Tables Vol C Tables 4.2.6.8 and 6.1.1.4' 
 'Cl'  'Cl'   0.3639   0.7018 
 'International Tables Vol C Tables 4.2.6.8 and 6.1.1.4' 
 
_symmetry_cell_setting            monoclinic 
_symmetry_space_group_name_H-M    'P 21'
_symmetry_space_group_name_Hall   'P 2yb'
 
loop_ 
 _symmetry_equiv_pos_as_xyz 
 'x, y, z' 
 '-x, y+1/2, -z' 
 
_cell_length_a                    12.080(2) 
_cell_length_b                    9.919(2) 
_cell_length_c                    13.700(3) 
_cell_angle_alpha                 90.00 
_cell_angle_beta                  90.45(3) 
_cell_angle_gamma                 90.00 
_cell_volume                      1641.4(6) 
_cell_formula_units_Z             4 
_cell_measurement_temperature     296(2) 
_cell_measurement_reflns_used     6184 
_cell_measurement_theta_min       3.23
_cell_measurement_theta_max       67.09 
 
_exptl_crystal_description        block 
_exptl_crystal_colour             yellow
_exptl_crystal_size_max           0.38 
_exptl_crystal_size_mid           0.32 
_exptl_crystal_size_min           0.26 
_exptl_crystal_density_meas       ? 
_exptl_crystal_density_diffrn     1.452 
_exptl_crystal_density_method     'not measured' 
_exptl_crystal_F_000              736 
_exptl_absorpt_coefficient_mu     2.350 
_exptl_absorpt_correction_type    multi-scan 
_exptl_absorpt_correction_T_min   0.4688 
_exptl_absorpt_correction_T_max   0.5802 
_exptl_absorpt_process_details    sadabs
 
_exptl_special_details 
; 
 ? 
; 
 
_diffrn_ambient_temperature       296(2) 
_diffrn_radiation_wavelength      1.54178 
_diffrn_radiation_type            CuK\a 
_diffrn_radiation_source          'fine-focus sealed tube' 
_diffrn_radiation_monochromator   graphite 
_diffrn_measurement_device_type   'Bruker APEX-II CCD' 
_diffrn_measurement_method        '\f and \w scans' 
_diffrn_detector_area_resol_mean  ? 
_diffrn_standards_number          0 
_diffrn_standards_interval_count  0 
_diffrn_standards_interval_time   0 
_diffrn_standards_decay_%         0 
_diffrn_reflns_number             7538 
_diffrn_reflns_av_R_equivalents   0.0258 
_diffrn_reflns_av_sigmaI/netI     0.0593 
_diffrn_reflns_limit_h_min        -14 
_diffrn_reflns_limit_h_max        14 
_diffrn_reflns_limit_k_min        -11 
_diffrn_reflns_limit_k_max        11 
_diffrn_reflns_limit_l_min        -16 
_diffrn_reflns_limit_l_max        12 
_diffrn_reflns_theta_min          3.23 
_diffrn_reflns_theta_max          64.98 
_reflns_number_total              4494 
_reflns_number_gt                 4387 
_reflns_threshold_expression      >2sigma(I) 
 
_computing_data_collection      'Bruker APEX2'
_computing_cell_refinement      'Bruker SAINT'
_computing_data_reduction       'Bruker SAINT' 
_computing_structure_solution   'SHELXS-97 (Sheldrick, 2008)'
_computing_structure_refinement 'SHELXL-97 (Sheldrick, 2008)'
_computing_molecular_graphics   'Bruker SHELXTL'
_computing_publication_material 'Bruker SHELXTL'

 
_refine_special_details 
; 
 Refinement of F^2^ against ALL reflections.  The weighted R-factor wR and 
 goodness of fit S are based on F^2^, conventional R-factors R are based 
 on F, with F set to zero for negative F^2^. The threshold expression of 
 F^2^ > 2sigma(F^2^) is used only for calculating R-factors(gt) etc. and is 
 not relevant to the choice of reflections for refinement.  R-factors based 
 on F^2^ are statistically about twice as large as those based on F, and R- 
 factors based on ALL data will be even larger. 
; 
 
_refine_ls_structure_factor_coef  Fsqd  
_refine_ls_matrix_type            full 
_refine_ls_weighting_scheme       calc  
_refine_ls_weighting_details 
 'calc w=1/[\s^2^(Fo^2^)+(0.0617P)^2^+0.1663P] where P=(Fo^2^+2Fc^2^)/3' 
_atom_sites_solution_primary      direct 
_atom_sites_solution_secondary    difmap 
_atom_sites_solution_hydrogens    geom 
_refine_ls_hydrogen_treatment     constr 
_refine_ls_extinction_method      SHELXL 
_refine_ls_extinction_coef        0.0150(9) 
_refine_ls_extinction_expression 
 'Fc^*^=kFc[1+0.001xFc^2^\l^3^/sin(2\q)]^-1/4^' 
_refine_ls_abs_structure_details 
 'Flack H D (1983), Acta Cryst. A39, 876-881' 
_refine_ls_abs_structure_Flack    0.073(15) 
_refine_ls_number_reflns          4494 
_refine_ls_number_parameters      452 
_refine_ls_number_restraints      1 
_refine_ls_R_factor_all           0.0419 
_refine_ls_R_factor_gt            0.0413 
_refine_ls_wR_factor_ref          0.1106 
_refine_ls_wR_factor_gt           0.1099 
_refine_ls_goodness_of_fit_ref    1.047 
_refine_ls_restrained_S_all       1.047 
_refine_ls_shift/su_max           0.000 
_refine_ls_shift/su_mean          0.000 
 
loop_ 
 _atom_site_label 
 _atom_site_type_symbol 
 _atom_site_fract_x 
 _atom_site_fract_y 
 _atom_site_fract_z 
 _atom_site_U_iso_or_equiv 
 _atom_site_adp_type 
 _atom_site_occupancy 
 _atom_site_symmetry_multiplicity 
 _atom_site_calc_flag 
 _atom_site_refinement_flags 
 _atom_site_disorder_assembly 
 _atom_site_disorder_group 
Cl1 Cl 0.30138(8) 0.62458(10) 0.74491(9) 0.1022(3) Uani 1 1 d . . . 
Cl2 Cl 0.49872(8) 0.56751(11) 0.52785(5) 0.0921(3) Uani 1 1 d . . . 
O1 O -0.2736(3) 1.3442(3) 0.6199(3) 0.1233(11) Uani 1 1 d . . . 
O2 O -0.2981(3) 1.3340(3) 0.7730(3) 0.1346(13) Uani 1 1 d . . . 
O3 O -0.3845(3) 0.7498(5) 0.8402(3) 0.1584(19) Uani 1 1 d . . . 
O4 O -0.2899(5) 0.8895(4) 0.9288(2) 0.163(2) Uani 1 1 d . . . 
O5 O -0.1460(3) 0.5666(4) 0.3901(3) 0.1365(13) Uani 1 1 d . . . 
O6 O 0.9816(3) 0.7411(4) 0.1565(3) 0.1197(10) Uani 1 1 d . . . 
O7 O 1.0468(2) 0.5978(5) 0.2606(2) 0.1426(15) Uani 1 1 d . . . 
O8 O 0.9369(3) 0.0702(3) 0.0441(2) 0.1173(10) Uani 1 1 d . . . 
O9 O 1.0857(3) 0.1586(3) 0.1026(2) 0.1149(10) Uani 1 1 d . . . 
O10 O 0.42187(16) 0.6499(2) 0.01726(18) 0.0812(6) Uani 1 1 d . . . 
N1 N -0.2831(2) 1.2813(3) 0.6936(3) 0.0896(9) Uani 1 1 d . . . 
N2 N -0.3234(3) 0.8479(4) 0.8514(2) 0.1054(12) Uani 1 1 d . . . 
N3 N 0.99009(18) 0.6280(4) 0.1892(2) 0.0890(9) Uani 1 1 d . . . 
N4 N 0.9890(3) 0.1651(4) 0.0768(2) 0.0919(9) Uani 1 1 d . . . 
C1 C -0.1831(3) 0.7407(3) 0.5017(2) 0.0720(7) Uani 1 1 d . . . 
C2 C -0.1701(3) 0.6571(3) 0.5921(2) 0.0699(7) Uani 1 1 d . . . 
H2A H -0.1909 0.5645 0.5748 0.084 Uiso 1 1 calc R . . 
C3 C -0.2518(2) 0.7050(3) 0.6705(3) 0.0709(7) Uani 1 1 d . . . 
H3A H -0.3245 0.6689 0.6552 0.085 Uiso 1 1 calc R . . 
H3B H -0.2290 0.6680 0.7330 0.085 Uiso 1 1 calc R . . 
C4 C -0.26076(18) 0.8550(3) 0.67993(19) 0.0566(5) Uani 1 1 d . . . 
C5 C -0.29168(19) 0.9230(3) 0.7636(2) 0.0636(6) Uani 1 1 d . . . 
C6 C -0.2986(2) 1.0617(3) 0.7715(2) 0.0666(6) Uani 1 1 d . . . 
H6A H -0.3170 1.1032 0.8301 0.080 Uiso 1 1 calc R . . 
C7 C -0.27717(18) 1.1349(3) 0.6892(2) 0.0614(6) Uani 1 1 d . . . 
C8 C -0.2498(2) 1.0750(3) 0.6025(2) 0.0602(6) Uani 1 1 d . . . 
H8A H -0.2376 1.1275 0.5474 0.072 Uiso 1 1 calc R . . 
C9 C -0.2403(2) 0.9353(2) 0.59744(18) 0.0544(5) Uani 1 1 d . . . 
C10 C -0.2137(3) 0.8703(3) 0.50607(19) 0.0667(6) Uani 1 1 d . . . 
H10A H -0.2180 0.9201 0.4486 0.080 Uiso 1 1 calc R . . 
C11 C -0.1643(4) 0.6804(5) 0.4048(3) 0.0974(11) Uani 1 1 d . . . 
H11A H -0.1672 0.7377 0.3511 0.117 Uiso 1 1 calc R . . 
C12 C -0.0501(2) 0.6528(2) 0.6288(2) 0.0643(6) Uani 1 1 d . . . 
C13 C 0.0272(2) 0.7530(3) 0.6113(2) 0.0710(7) Uani 1 1 d . . . 
H13A H 0.0062 0.8280 0.5748 0.085 Uiso 1 1 calc R . . 
C14 C 0.1338(3) 0.7448(3) 0.6464(3) 0.0758(8) Uani 1 1 d . . . 
H14A H 0.1840 0.8133 0.6332 0.091 Uiso 1 1 calc R . . 
C15 C 0.1658(2) 0.6359(3) 0.7004(2) 0.0725(7) Uani 1 1 d . . . 
C16 C 0.0917(3) 0.5340(3) 0.7211(3) 0.0799(8) Uani 1 1 d . . . 
H16A H 0.1135 0.4602 0.7585 0.096 Uiso 1 1 calc R . . 
C17 C -0.0152(3) 0.5436(3) 0.6854(2) 0.0743(8) Uani 1 1 d . . . 
H17A H -0.0654 0.4753 0.6995 0.089 Uiso 1 1 calc R . . 
C18 C 0.60011(19) 0.5544(3) 0.03672(18) 0.0566(5) Uani 1 1 d . . . 
C19 C 0.63706(17) 0.6567(2) 0.11042(18) 0.0506(5) Uani 1 1 d . . . 
H19A H 0.6049 0.7433 0.0907 0.061 Uiso 1 1 calc R . . 
C20 C 0.76377(19) 0.6727(3) 0.10682(19) 0.0556(5) Uani 1 1 d . . . 
H20A H 0.7830 0.7250 0.0496 0.067 Uiso 1 1 calc R . . 
H20B H 0.7884 0.7226 0.1639 0.067 Uiso 1 1 calc R . . 
C21 C 0.82403(19) 0.5400(3) 0.10352(17) 0.0536(5) Uani 1 1 d . . . 
C22 C 0.92781(19) 0.5178(3) 0.14253(19) 0.0650(6) Uani 1 1 d . . . 
C23 C 0.9827(2) 0.3952(4) 0.1360(2) 0.0738(8) Uani 1 1 d . . . 
H23A H 1.0523 0.3829 0.1640 0.089 Uiso 1 1 calc R . . 
C24 C 0.9308(2) 0.2942(3) 0.0871(2) 0.0706(8) Uani 1 1 d . . . 
C25 C 0.8272(2) 0.3087(3) 0.0457(2) 0.0650(6) Uani 1 1 d . . . 
H25A H 0.7936 0.2374 0.0127 0.078 Uiso 1 1 calc R . . 
C26 C 0.7741(2) 0.4319(3) 0.05426(18) 0.0561(6) Uani 1 1 d . . . 
C27 C 0.6640(2) 0.4510(3) 0.01220(19) 0.0598(6) Uani 1 1 d . . . 
H27A H 0.6376 0.3889 -0.0332 0.072 Uiso 1 1 calc R . . 
C28 C 0.4888(2) 0.5669(3) -0.0059(2) 0.0686(7) Uani 1 1 d . . . 
H28A H 0.4688 0.5059 -0.0545 0.082 Uiso 1 1 calc R . . 
C29 C 0.59871(16) 0.6291(2) 0.21384(17) 0.0493(5) Uani 1 1 d . . . 
C30 C 0.5746(2) 0.7367(2) 0.2743(2) 0.0605(6) Uani 1 1 d . . . 
H30A H 0.5781 0.8239 0.2495 0.073 Uiso 1 1 calc R . . 
C31 C 0.5457(2) 0.7179(3) 0.3699(2) 0.0683(7) Uani 1 1 d . . . 
H31A H 0.5307 0.7916 0.4097 0.082 Uiso 1 1 calc R . . 
C32 C 0.5392(2) 0.5895(3) 0.4063(2) 0.0637(6) Uani 1 1 d . . . 
C33 C 0.5624(2) 0.4799(3) 0.3492(2) 0.0634(6) Uani 1 1 d . . . 
H33A H 0.5587 0.3932 0.3747 0.076 Uiso 1 1 calc R . . 
C34 C 0.59133(19) 0.5002(2) 0.25279(19) 0.0561(5) Uani 1 1 d . . . 
H34A H 0.6061 0.4262 0.2133 0.067 Uiso 1 1 calc R . . 
 
loop_ 
 _atom_site_aniso_label 
 _atom_site_aniso_U_11 
 _atom_site_aniso_U_22 
 _atom_site_aniso_U_33 
 _atom_site_aniso_U_23 
 _atom_site_aniso_U_13 
 _atom_site_aniso_U_12 
Cl1 0.0876(5) 0.0914(6) 0.1278(8) -0.0070(5) 0.0018(5) 0.0209(4) 
Cl2 0.1034(5) 0.1178(7) 0.0551(4) 0.0040(4) 0.0079(4) -0.0181(5) 
O1 0.144(3) 0.0551(13) 0.171(3) 0.0091(17) 0.028(2) -0.0111(14) 
O2 0.158(3) 0.0886(18) 0.158(3) -0.057(2) 0.025(3) -0.0051(18) 
O3 0.127(2) 0.173(4) 0.176(4) 0.098(3) 0.078(2) 0.008(3) 
O4 0.275(6) 0.151(3) 0.0635(16) 0.0281(19) 0.033(2) 0.107(3) 
O5 0.166(3) 0.100(2) 0.145(3) -0.057(2) 0.044(2) -0.015(2) 
O6 0.0880(17) 0.105(2) 0.166(3) -0.042(2) -0.0041(18) -0.0166(15) 
O7 0.0713(14) 0.233(4) 0.123(2) -0.035(3) -0.0349(16) 0.000(2) 
O8 0.156(3) 0.0856(17) 0.112(2) -0.0021(16) 0.0439(19) 0.0465(19) 
O9 0.1027(18) 0.134(2) 0.1082(19) 0.0347(17) 0.0423(15) 0.0652(17) 
O10 0.0584(10) 0.0886(14) 0.0967(15) 0.0133(12) -0.0005(10) 0.0082(10) 
N1 0.0776(15) 0.0622(15) 0.129(3) -0.0160(19) 0.0106(16) -0.0112(12) 
N2 0.111(2) 0.130(3) 0.076(2) 0.042(2) 0.0440(17) 0.062(2) 
N3 0.0428(10) 0.133(3) 0.0915(19) -0.0333(19) 0.0032(11) 0.0000(13) 
N4 0.105(2) 0.094(2) 0.0776(18) 0.0179(16) 0.0426(16) 0.0443(18) 
C1 0.0872(17) 0.0622(16) 0.0665(16) -0.0108(14) 0.0054(13) -0.0151(14) 
C2 0.0816(16) 0.0416(12) 0.0867(19) -0.0048(12) 0.0095(14) -0.0136(11) 
C3 0.0665(14) 0.0567(14) 0.090(2) 0.0166(13) 0.0088(13) -0.0125(11) 
C4 0.0468(10) 0.0612(13) 0.0618(14) 0.0080(11) 0.0030(10) -0.0054(9) 
C5 0.0480(11) 0.0848(18) 0.0583(14) 0.0131(13) 0.0109(10) 0.0117(11) 
C6 0.0527(11) 0.0839(18) 0.0633(14) -0.0086(14) 0.0046(10) 0.0110(12) 
C7 0.0485(11) 0.0547(13) 0.0809(17) -0.0094(13) 0.0036(11) -0.0049(9) 
C8 0.0585(11) 0.0553(13) 0.0669(15) 0.0109(12) 0.0015(10) -0.0097(10) 
C9 0.0577(12) 0.0527(12) 0.0528(13) 0.0036(10) 0.0020(10) -0.0087(10) 
C10 0.0834(16) 0.0666(16) 0.0501(13) 0.0025(12) 0.0036(12) -0.0108(13) 
C11 0.114(3) 0.093(3) 0.085(2) -0.031(2) 0.017(2) -0.015(2) 
C12 0.0775(15) 0.0400(11) 0.0756(16) -0.0063(11) 0.0191(13) -0.0009(10) 
C13 0.0789(16) 0.0467(13) 0.0875(19) 0.0074(13) 0.0120(14) -0.0020(12) 
C14 0.0771(16) 0.0582(15) 0.092(2) -0.0020(15) 0.0153(15) -0.0079(13) 
C15 0.0798(16) 0.0544(14) 0.0835(18) -0.0104(14) 0.0190(14) 0.0131(12) 
C16 0.100(2) 0.0522(15) 0.088(2) 0.0048(13) 0.0230(17) 0.0169(14) 
C17 0.0890(19) 0.0452(13) 0.089(2) 0.0026(13) 0.0234(15) -0.0029(12) 
C18 0.0560(11) 0.0585(13) 0.0552(12) 0.0049(11) 0.0027(10) -0.0018(10) 
C19 0.0490(10) 0.0464(11) 0.0566(12) 0.0057(10) 0.0025(9) 0.0044(8) 
C20 0.0539(11) 0.0554(12) 0.0575(13) -0.0005(10) 0.0073(10) -0.0051(9) 
C21 0.0512(11) 0.0613(13) 0.0486(11) 0.0022(10) 0.0109(9) 0.0010(10) 
C22 0.0484(11) 0.0895(18) 0.0573(14) -0.0029(13) 0.0088(10) 0.0043(12) 
C23 0.0569(13) 0.105(2) 0.0598(15) 0.0133(16) 0.0158(11) 0.0224(15) 
C24 0.0737(15) 0.0772(17) 0.0613(15) 0.0106(14) 0.0282(13) 0.0235(14) 
C25 0.0765(15) 0.0605(14) 0.0583(14) -0.0023(11) 0.0198(12) 0.0065(12) 
C26 0.0581(12) 0.0585(13) 0.0517(12) -0.0009(10) 0.0113(10) 0.0036(10) 
C27 0.0620(13) 0.0619(14) 0.0556(13) -0.0049(11) 0.0019(11) -0.0060(11) 
C28 0.0635(14) 0.0726(16) 0.0694(15) 0.0073(14) -0.0046(11) -0.0069(13) 
C29 0.0424(9) 0.0480(11) 0.0576(12) -0.0001(10) -0.0002(8) 0.0030(8) 
C30 0.0680(13) 0.0445(11) 0.0692(15) -0.0013(11) 0.0101(11) -0.0014(10) 
C31 0.0735(15) 0.0687(16) 0.0628(15) -0.0133(13) 0.0095(12) -0.0030(12) 
C32 0.0570(11) 0.0765(17) 0.0577(13) 0.0035(12) 0.0005(10) -0.0055(11) 
C33 0.0642(13) 0.0578(14) 0.0683(15) 0.0119(12) 0.0019(11) -0.0043(11) 
C34 0.0558(11) 0.0492(12) 0.0634(14) 0.0015(11) 0.0032(10) 0.0036(9) 
 
_geom_special_details 
; 
 All esds (except the esd in the dihedral angle between two l.s. planes) 
 are estimated using the full covariance matrix.  The cell esds are taken 
 into account individually in the estimation of esds in distances, angles 
 and torsion angles; correlations between esds in cell parameters are only 
 used when they are defined by crystal symmetry.  An approximate (isotropic) 
 treatment of cell esds is used for estimating esds involving l.s. planes. 
; 
 
loop_ 
 _geom_bond_atom_site_label_1 
 _geom_bond_atom_site_label_2 
 _geom_bond_distance 
 _geom_bond_site_symmetry_2 
 _geom_bond_publ_flag 
Cl1 C15 1.747(3) . ? 
Cl2 C32 1.753(3) . ? 
O1 N1 1.193(5) . ? 
O2 N1 1.222(5) . ? 
O3 N2 1.230(7) . ? 
O4 N2 1.206(6) . ? 
O5 C11 1.168(5) . ? 
O6 N3 1.211(5) . ? 
O7 N3 1.227(4) . ? 
O8 N4 1.216(5) . ? 
O9 N4 1.219(5) . ? 
O10 C28 1.199(4) . ? 
N1 C7 1.455(4) . ? 
N2 C5 1.468(4) . ? 
N3 C22 1.470(4) . ? 
N4 C24 1.468(4) . ? 
C1 C10 1.339(4) . ? 
C1 C11 1.475(5) . ? 
C1 C2 1.498(5) . ? 
C2 C12 1.531(4) . ? 
C2 C3 1.539(5) . ? 
C2 H2A 0.9800 . ? 
C3 C4 1.498(4) . ? 
C3 H3A 0.9700 . ? 
C3 H3B 0.9700 . ? 
C4 C5 1.383(4) . ? 
C4 C9 1.406(4) . ? 
C5 C6 1.383(5) . ? 
C6 C7 1.369(4) . ? 
C6 H6A 0.9300 . ? 
C7 C8 1.370(4) . ? 
C8 C9 1.392(4) . ? 
C8 H8A 0.9300 . ? 
C9 C10 1.446(4) . ? 
C10 H10A 0.9300 . ? 
C11 H11A 0.9300 . ? 
C12 C13 1.386(4) . ? 
C12 C17 1.395(4) . ? 
C13 C14 1.373(4) . ? 
C13 H13A 0.9300 . ? 
C14 C15 1.363(5) . ? 
C14 H14A 0.9300 . ? 
C15 C16 1.381(5) . ? 
C16 C17 1.381(5) . ? 
C16 H16A 0.9300 . ? 
C17 H17A 0.9300 . ? 
C18 C27 1.328(4) . ? 
C18 C28 1.467(4) . ? 
C18 C19 1.497(4) . ? 
C19 C29 1.519(3) . ? 
C19 C20 1.540(3) . ? 
C19 H19A 0.9800 . ? 
C20 C21 1.505(4) . ? 
C20 H20A 0.9700 . ? 
C20 H20B 0.9700 . ? 
C21 C22 1.377(3) . ? 
C21 C26 1.401(4) . ? 
C22 C23 1.388(4) . ? 
C23 C24 1.355(5) . ? 
C23 H23A 0.9300 . ? 
C24 C25 1.379(4) . ? 
C25 C26 1.385(4) . ? 
C25 H25A 0.9300 . ? 
C26 C27 1.458(3) . ? 
C27 H27A 0.9300 . ? 
C28 H28A 0.9300 . ? 
C29 C30 1.383(4) . ? 
C29 C34 1.388(3) . ? 
C30 C31 1.371(4) . ? 
C30 H30A 0.9300 . ? 
C31 C32 1.370(4) . ? 
C31 H31A 0.9300 . ? 
C32 C33 1.370(4) . ? 
C33 C34 1.383(4) . ? 
C33 H33A 0.9300 . ? 
C34 H34A 0.9300 . ? 
 
loop_ 
 _geom_angle_atom_site_label_1 
 _geom_angle_atom_site_label_2 
 _geom_angle_atom_site_label_3 
 _geom_angle 
 _geom_angle_site_symmetry_1 
 _geom_angle_site_symmetry_3 
 _geom_angle_publ_flag 
O1 N1 O2 123.1(3) . . ? 
O1 N1 C7 118.8(3) . . ? 
O2 N1 C7 118.2(4) . . ? 
O4 N2 O3 125.2(4) . . ? 
O4 N2 C5 117.4(5) . . ? 
O3 N2 C5 117.4(4) . . ? 
O6 N3 O7 124.4(4) . . ? 
O6 N3 C22 119.1(3) . . ? 
O7 N3 C22 116.5(4) . . ? 
O8 N4 O9 123.9(3) . . ? 
O8 N4 C24 117.7(3) . . ? 
O9 N4 C24 118.5(4) . . ? 
C10 C1 C11 118.3(3) . . ? 
C10 C1 C2 121.5(3) . . ? 
C11 C1 C2 120.2(3) . . ? 
C1 C2 C12 112.3(2) . . ? 
C1 C2 C3 110.0(3) . . ? 
C12 C2 C3 113.0(2) . . ? 
C1 C2 H2A 107.1 . . ? 
C12 C2 H2A 107.1 . . ? 
C3 C2 H2A 107.1 . . ? 
C4 C3 C2 114.5(2) . . ? 
C4 C3 H3A 108.6 . . ? 
C2 C3 H3A 108.6 . . ? 
C4 C3 H3B 108.6 . . ? 
C2 C3 H3B 108.6 . . ? 
H3A C3 H3B 107.6 . . ? 
C5 C4 C9 116.1(2) . . ? 
C5 C4 C3 125.2(3) . . ? 
C9 C4 C3 118.7(3) . . ? 
C6 C5 C4 124.5(2) . . ? 
C6 C5 N2 115.0(3) . . ? 
C4 C5 N2 120.4(3) . . ? 
C7 C6 C5 116.8(2) . . ? 
C7 C6 H6A 121.6 . . ? 
C5 C6 H6A 121.6 . . ? 
C6 C7 C8 122.2(2) . . ? 
C6 C7 N1 119.0(3) . . ? 
C8 C7 N1 118.8(3) . . ? 
C7 C8 C9 119.7(2) . . ? 
C7 C8 H8A 120.1 . . ? 
C9 C8 H8A 120.1 . . ? 
C8 C9 C4 120.6(2) . . ? 
C8 C9 C10 120.4(2) . . ? 
C4 C9 C10 119.0(2) . . ? 
C1 C10 C9 122.0(2) . . ? 
C1 C10 H10A 119.0 . . ? 
C9 C10 H10A 119.0 . . ? 
O5 C11 C1 125.3(5) . . ? 
O5 C11 H11A 117.3 . . ? 
C1 C11 H11A 117.3 . . ? 
C13 C12 C17 116.9(3) . . ? 
C13 C12 C2 124.1(2) . . ? 
C17 C12 C2 119.0(2) . . ? 
C14 C13 C12 121.9(3) . . ? 
C14 C13 H13A 119.1 . . ? 
C12 C13 H13A 119.1 . . ? 
C15 C14 C13 119.9(3) . . ? 
C15 C14 H14A 120.1 . . ? 
C13 C14 H14A 120.1 . . ? 
C14 C15 C16 120.6(3) . . ? 
C14 C15 Cl1 120.1(2) . . ? 
C16 C15 Cl1 119.2(3) . . ? 
C15 C16 C17 118.8(3) . . ? 
C15 C16 H16A 120.6 . . ? 
C17 C16 H16A 120.6 . . ? 
C16 C17 C12 121.9(3) . . ? 
C16 C17 H17A 119.1 . . ? 
C12 C17 H17A 119.1 . . ? 
C27 C18 C28 119.8(2) . . ? 
C27 C18 C19 121.6(2) . . ? 
C28 C18 C19 118.6(2) . . ? 
C18 C19 C29 114.54(19) . . ? 
C18 C19 C20 109.83(19) . . ? 
C29 C19 C20 111.04(19) . . ? 
C18 C19 H19A 107.0 . . ? 
C29 C19 H19A 107.0 . . ? 
C20 C19 H19A 107.0 . . ? 
C21 C20 C19 113.08(19) . . ? 
C21 C20 H20A 109.0 . . ? 
C19 C20 H20A 109.0 . . ? 
C21 C20 H20B 109.0 . . ? 
C19 C20 H20B 109.0 . . ? 
H20A C20 H20B 107.8 . . ? 
C22 C21 C26 116.9(2) . . ? 
C22 C21 C20 124.5(2) . . ? 
C26 C21 C20 118.5(2) . . ? 
C21 C22 C23 123.3(3) . . ? 
C21 C22 N3 120.8(3) . . ? 
C23 C22 N3 115.9(3) . . ? 
C24 C23 C22 117.4(3) . . ? 
C24 C23 H23A 121.3 . . ? 
C22 C23 H23A 121.3 . . ? 
C23 C24 C25 122.7(3) . . ? 
C23 C24 N4 118.2(3) . . ? 
C25 C24 N4 119.0(3) . . ? 
C24 C25 C26 118.5(3) . . ? 
C24 C25 H25A 120.8 . . ? 
C26 C25 H25A 120.8 . . ? 
C25 C26 C21 121.2(2) . . ? 
C25 C26 C27 120.2(2) . . ? 
C21 C26 C27 118.6(2) . . ? 
C18 C27 C26 122.1(2) . . ? 
C18 C27 H27A 119.0 . . ? 
C26 C27 H27A 119.0 . . ? 
O10 C28 C18 124.8(3) . . ? 
O10 C28 H28A 117.6 . . ? 
C18 C28 H28A 117.6 . . ? 
C30 C29 C34 117.8(2) . . ? 
C30 C29 C19 119.1(2) . . ? 
C34 C29 C19 123.1(2) . . ? 
C31 C30 C29 121.6(2) . . ? 
C31 C30 H30A 119.2 . . ? 
C29 C30 H30A 119.2 . . ? 
C32 C31 C30 119.3(3) . . ? 
C32 C31 H31A 120.3 . . ? 
C30 C31 H31A 120.3 . . ? 
C33 C32 C31 121.2(3) . . ? 
C33 C32 Cl2 120.2(2) . . ? 
C31 C32 Cl2 118.6(2) . . ? 
C32 C33 C34 118.9(2) . . ? 
C32 C33 H33A 120.5 . . ? 
C34 C33 H33A 120.5 . . ? 
C33 C34 C29 121.2(2) . . ? 
C33 C34 H34A 119.4 . . ? 
C29 C34 H34A 119.4 . . ? 
 
loop_ 
 _geom_torsion_atom_site_label_1 
 _geom_torsion_atom_site_label_2 
 _geom_torsion_atom_site_label_3 
 _geom_torsion_atom_site_label_4 
 _geom_torsion 
 _geom_torsion_site_symmetry_1 
 _geom_torsion_site_symmetry_2 
 _geom_torsion_site_symmetry_3 
 _geom_torsion_site_symmetry_4 
 _geom_torsion_publ_flag 
C10 C1 C2 C12 -95.4(3) . . . . ? 
C11 C1 C2 C12 85.7(3) . . . . ? 
C10 C1 C2 C3 31.3(4) . . . . ? 
C11 C1 C2 C3 -147.5(3) . . . . ? 
C1 C2 C3 C4 -42.8(3) . . . . ? 
C12 C2 C3 C4 83.6(3) . . . . ? 
C2 C3 C4 C5 -154.0(3) . . . . ? 
C2 C3 C4 C9 28.4(4) . . . . ? 
C9 C4 C5 C6 -2.9(4) . . . . ? 
C3 C4 C5 C6 179.4(3) . . . . ? 
C9 C4 C5 N2 175.2(3) . . . . ? 
C3 C4 C5 N2 -2.6(4) . . . . ? 
O4 N2 C5 C6 -43.4(4) . . . . ? 
O3 N2 C5 C6 134.7(3) . . . . ? 
O4 N2 C5 C4 138.3(3) . . . . ? 
O3 N2 C5 C4 -43.5(4) . . . . ? 
C4 C5 C6 C7 2.6(4) . . . . ? 
N2 C5 C6 C7 -175.6(3) . . . . ? 
C5 C6 C7 C8 -0.2(4) . . . . ? 
C5 C6 C7 N1 -179.9(2) . . . . ? 
O1 N1 C7 C6 -173.7(3) . . . . ? 
O2 N1 C7 C6 6.0(4) . . . . ? 
O1 N1 C7 C8 6.5(4) . . . . ? 
O2 N1 C7 C8 -173.8(3) . . . . ? 
C6 C7 C8 C9 -1.7(4) . . . . ? 
N1 C7 C8 C9 178.0(2) . . . . ? 
C7 C8 C9 C4 1.3(4) . . . . ? 
C7 C8 C9 C10 178.7(2) . . . . ? 
C5 C4 C9 C8 0.9(3) . . . . ? 
C3 C4 C9 C8 178.7(2) . . . . ? 
C5 C4 C9 C10 -176.5(2) . . . . ? 
C3 C4 C9 C10 1.3(4) . . . . ? 
C11 C1 C10 C9 176.3(3) . . . . ? 
C2 C1 C10 C9 -2.6(4) . . . . ? 
C8 C9 C10 C1 166.9(3) . . . . ? 
C4 C9 C10 C1 -15.6(4) . . . . ? 
C10 C1 C11 O5 -173.7(4) . . . . ? 
C2 C1 C11 O5 5.2(6) . . . . ? 
C1 C2 C12 C13 26.3(4) . . . . ? 
C3 C2 C12 C13 -98.8(3) . . . . ? 
C1 C2 C12 C17 -155.2(3) . . . . ? 
C3 C2 C12 C17 79.6(3) . . . . ? 
C17 C12 C13 C14 1.1(4) . . . . ? 
C2 C12 C13 C14 179.6(3) . . . . ? 
C12 C13 C14 C15 -0.3(5) . . . . ? 
C13 C14 C15 C16 -0.6(5) . . . . ? 
C13 C14 C15 Cl1 179.8(2) . . . . ? 
C14 C15 C16 C17 0.6(5) . . . . ? 
Cl1 C15 C16 C17 -179.8(2) . . . . ? 
C15 C16 C17 C12 0.3(5) . . . . ? 
C13 C12 C17 C16 -1.1(4) . . . . ? 
C2 C12 C17 C16 -179.7(3) . . . . ? 
C27 C18 C19 C29 -94.6(3) . . . . ? 
C28 C18 C19 C29 83.0(3) . . . . ? 
C27 C18 C19 C20 31.2(3) . . . . ? 
C28 C18 C19 C20 -151.3(2) . . . . ? 
C18 C19 C20 C21 -45.7(3) . . . . ? 
C29 C19 C20 C21 82.0(2) . . . . ? 
C19 C20 C21 C22 -149.2(2) . . . . ? 
C19 C20 C21 C26 33.4(3) . . . . ? 
C26 C21 C22 C23 -0.7(4) . . . . ? 
C20 C21 C22 C23 -178.1(2) . . . . ? 
C26 C21 C22 N3 175.5(2) . . . . ? 
C20 C21 C22 N3 -1.9(4) . . . . ? 
O6 N3 C22 C21 -35.2(4) . . . . ? 
O7 N3 C22 C21 143.9(3) . . . . ? 
O6 N3 C22 C23 141.3(3) . . . . ? 
O7 N3 C22 C23 -39.6(4) . . . . ? 
C21 C22 C23 C24 1.0(4) . . . . ? 
N3 C22 C23 C24 -175.4(3) . . . . ? 
C22 C23 C24 C25 -0.7(4) . . . . ? 
C22 C23 C24 N4 178.1(2) . . . . ? 
O8 N4 C24 C23 170.8(3) . . . . ? 
O9 N4 C24 C23 -8.2(4) . . . . ? 
O8 N4 C24 C25 -10.3(4) . . . . ? 
O9 N4 C24 C25 170.7(3) . . . . ? 
C23 C24 C25 C26 0.1(4) . . . . ? 
N4 C24 C25 C26 -178.7(2) . . . . ? 
C24 C25 C26 C21 0.2(4) . . . . ? 
C24 C25 C26 C27 -179.5(2) . . . . ? 
C22 C21 C26 C25 0.1(3) . . . . ? 
C20 C21 C26 C25 177.6(2) . . . . ? 
C22 C21 C26 C27 179.8(2) . . . . ? 
C20 C21 C26 C27 -2.7(3) . . . . ? 
C28 C18 C27 C26 -178.4(2) . . . . ? 
C19 C18 C27 C26 -0.9(4) . . . . ? 
C25 C26 C27 C18 164.5(3) . . . . ? 
C21 C26 C27 C18 -15.2(4) . . . . ? 
C27 C18 C28 O10 173.7(3) . . . . ? 
C19 C18 C28 O10 -3.9(4) . . . . ? 
C18 C19 C29 C30 -146.4(2) . . . . ? 
C20 C19 C29 C30 88.5(2) . . . . ? 
C18 C19 C29 C34 36.7(3) . . . . ? 
C20 C19 C29 C34 -88.4(3) . . . . ? 
C34 C29 C30 C31 0.8(4) . . . . ? 
C19 C29 C30 C31 -176.3(2) . . . . ? 
C29 C30 C31 C32 -0.8(4) . . . . ? 
C30 C31 C32 C33 0.8(4) . . . . ? 
C30 C31 C32 Cl2 -178.4(2) . . . . ? 
C31 C32 C33 C34 -0.8(4) . . . . ? 
Cl2 C32 C33 C34 178.33(19) . . . . ? 
C32 C33 C34 C29 0.9(4) . . . . ? 
C30 C29 C34 C33 -0.9(3) . . . . ? 
C19 C29 C34 C33 176.1(2) . . . . ? 
 
_diffrn_measured_fraction_theta_max    0.914 
_diffrn_reflns_theta_full              64.98 
_diffrn_measured_fraction_theta_full   0.914 
_refine_diff_density_max    0.173 
_refine_diff_density_min   -0.215 
_refine_diff_density_rms    0.049 
